# Supplementary material for: Management of Infants with Brief Resolved Unexplained Events (BRUE) and Apparent Life-Threatening Events (ALTE): A RAND/UCLA Appropriateness Approach
Source: PubMed Central journal article supplement (PMC7926945; doi:10.3390/life11020171), 2021-02-22

# 1. For the prevention of ALTE / BRUE:

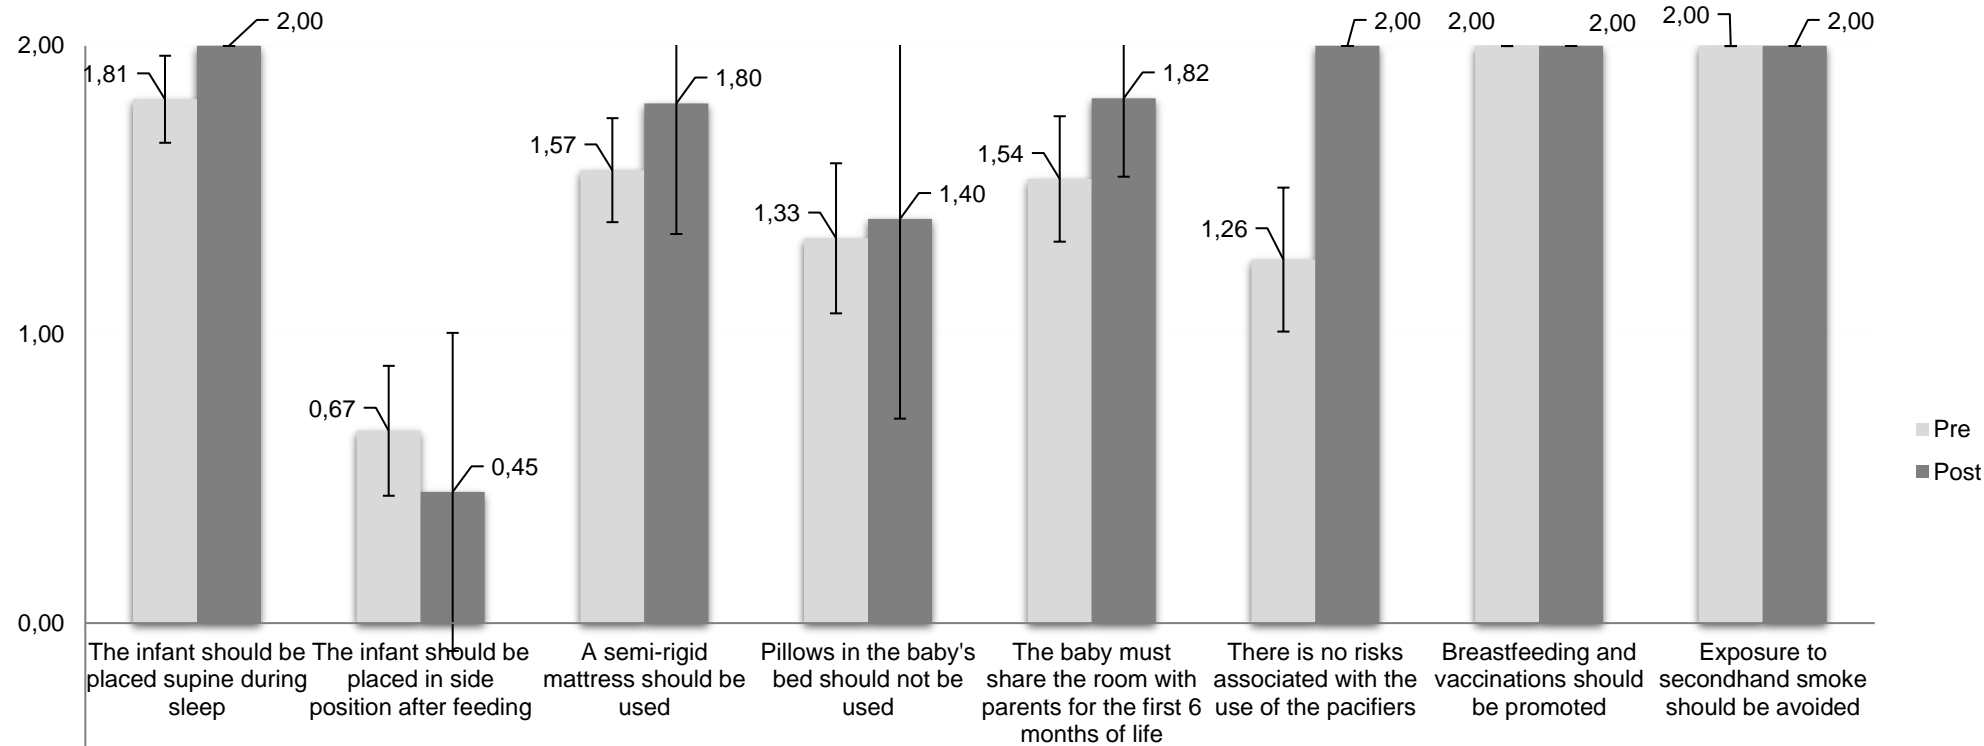

-1,00

## 2. In case of BRUE/ALTE an emergency room evaluation should be carried out in case of:

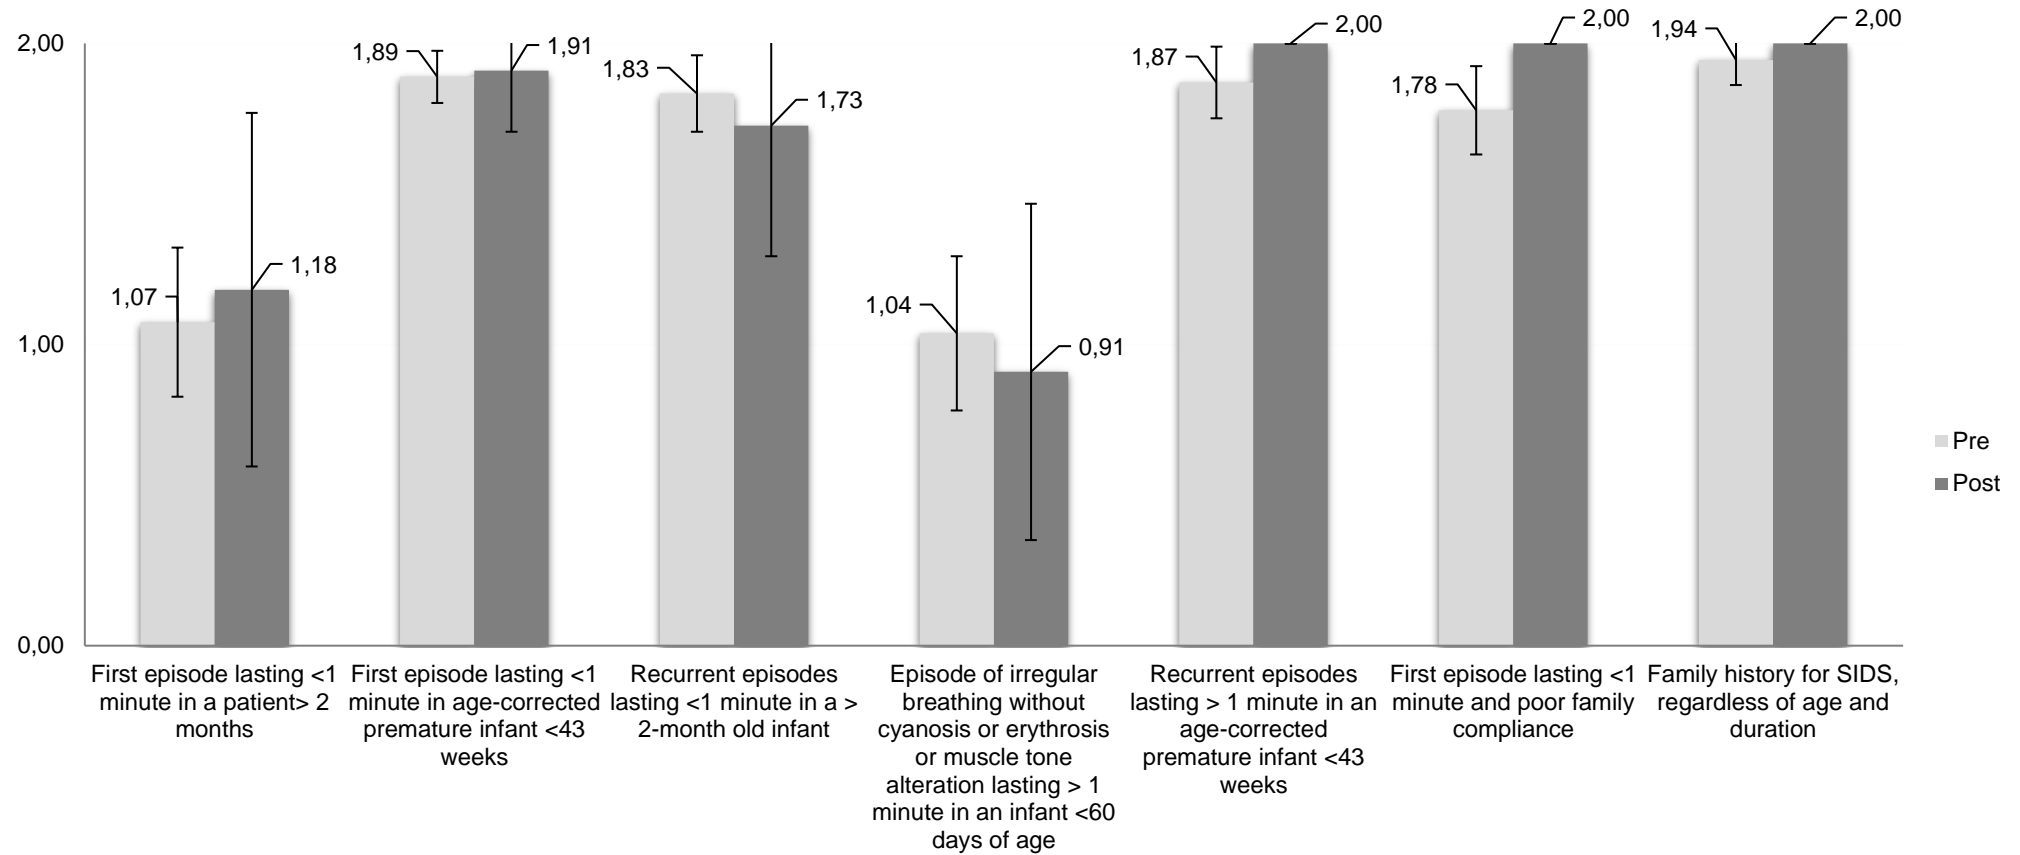

### 3. In case of BRUE/ALTE, hospitalization is indicated in case of:

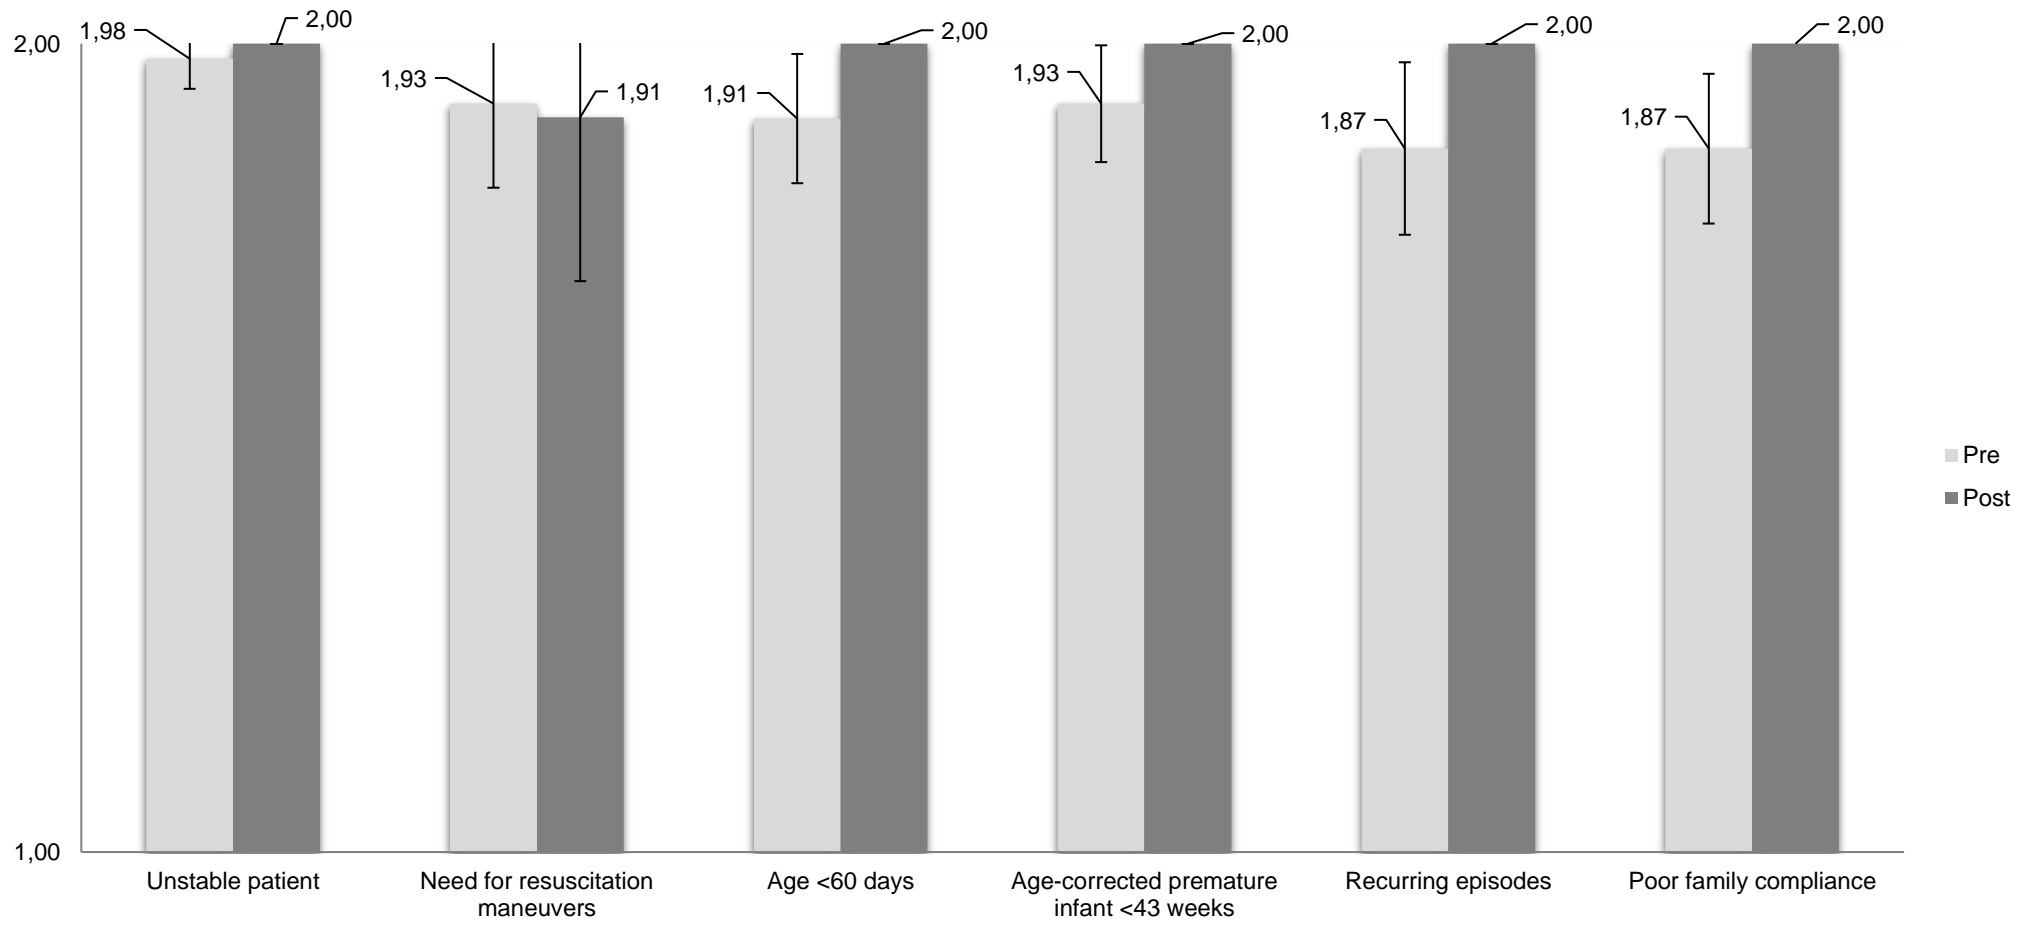

#### 4. When a patient with BRUE/ALTE does not need hospitalizaion:

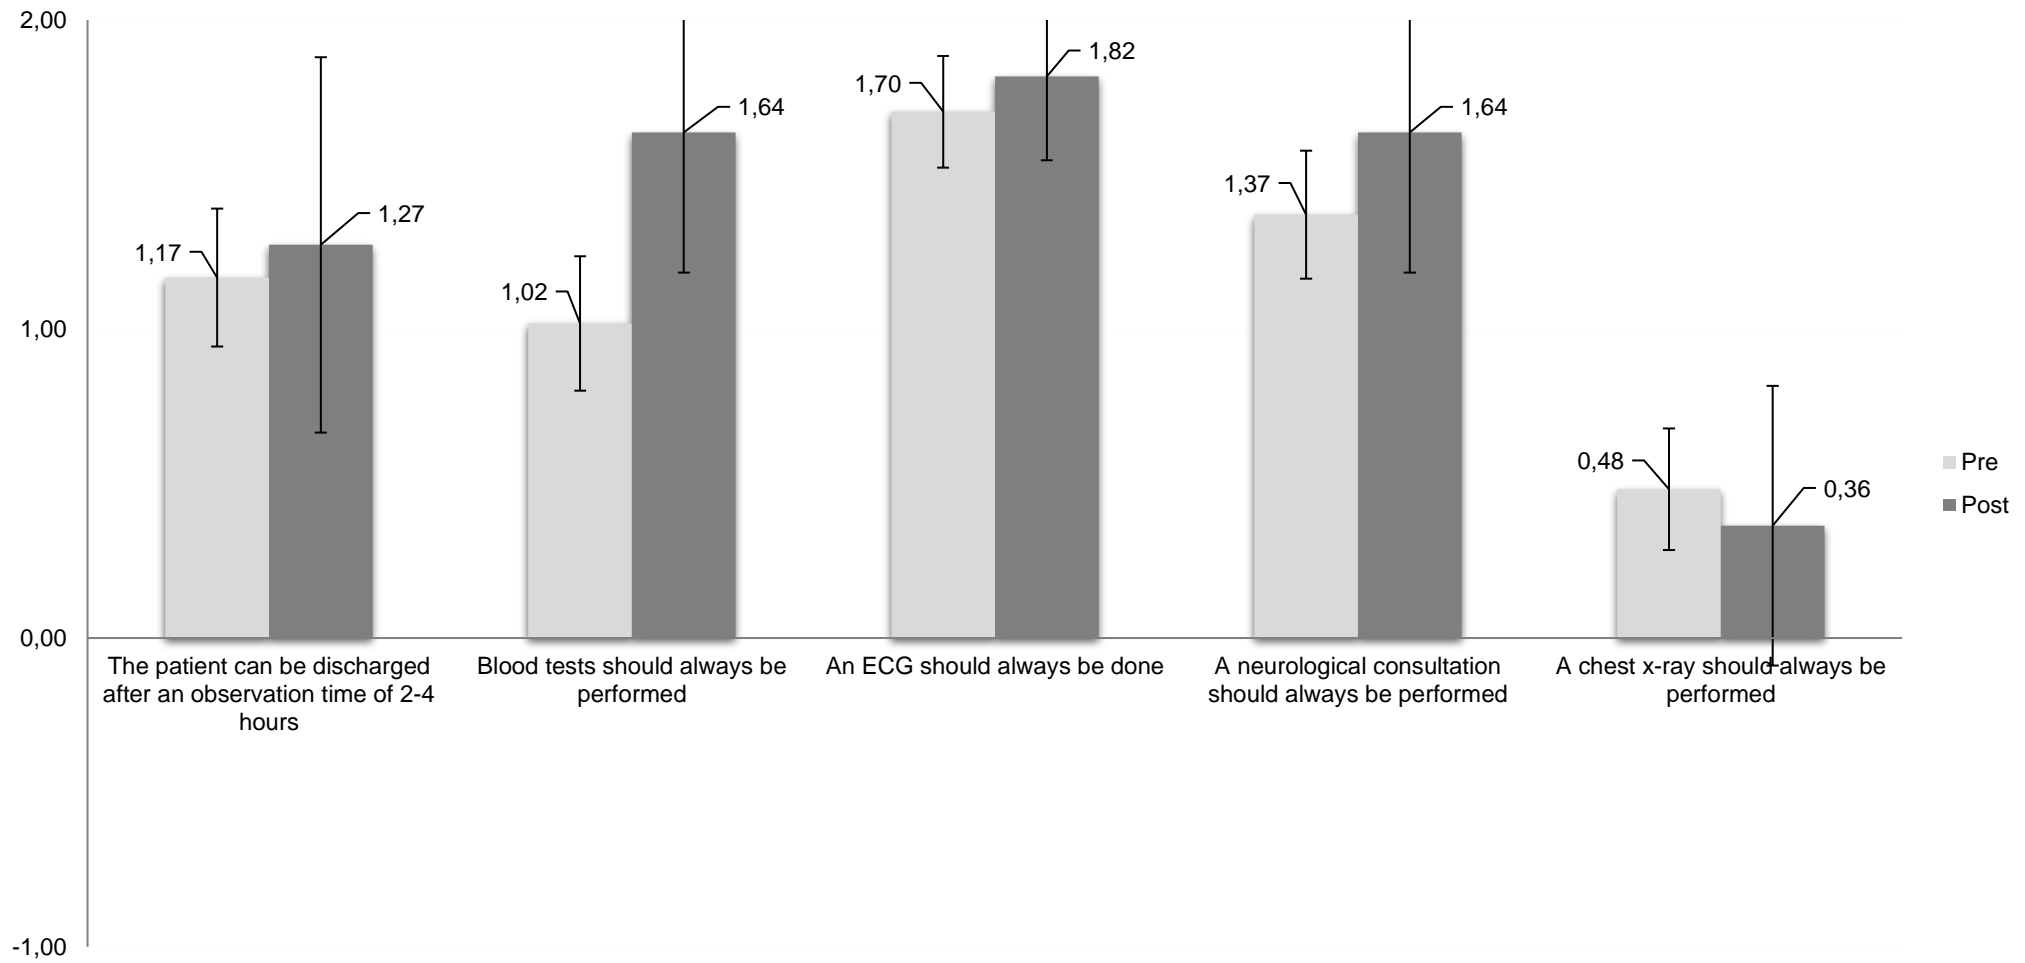

## 5. In case of recurrent episodes of BRUE / ALTE associated with regurgitation:

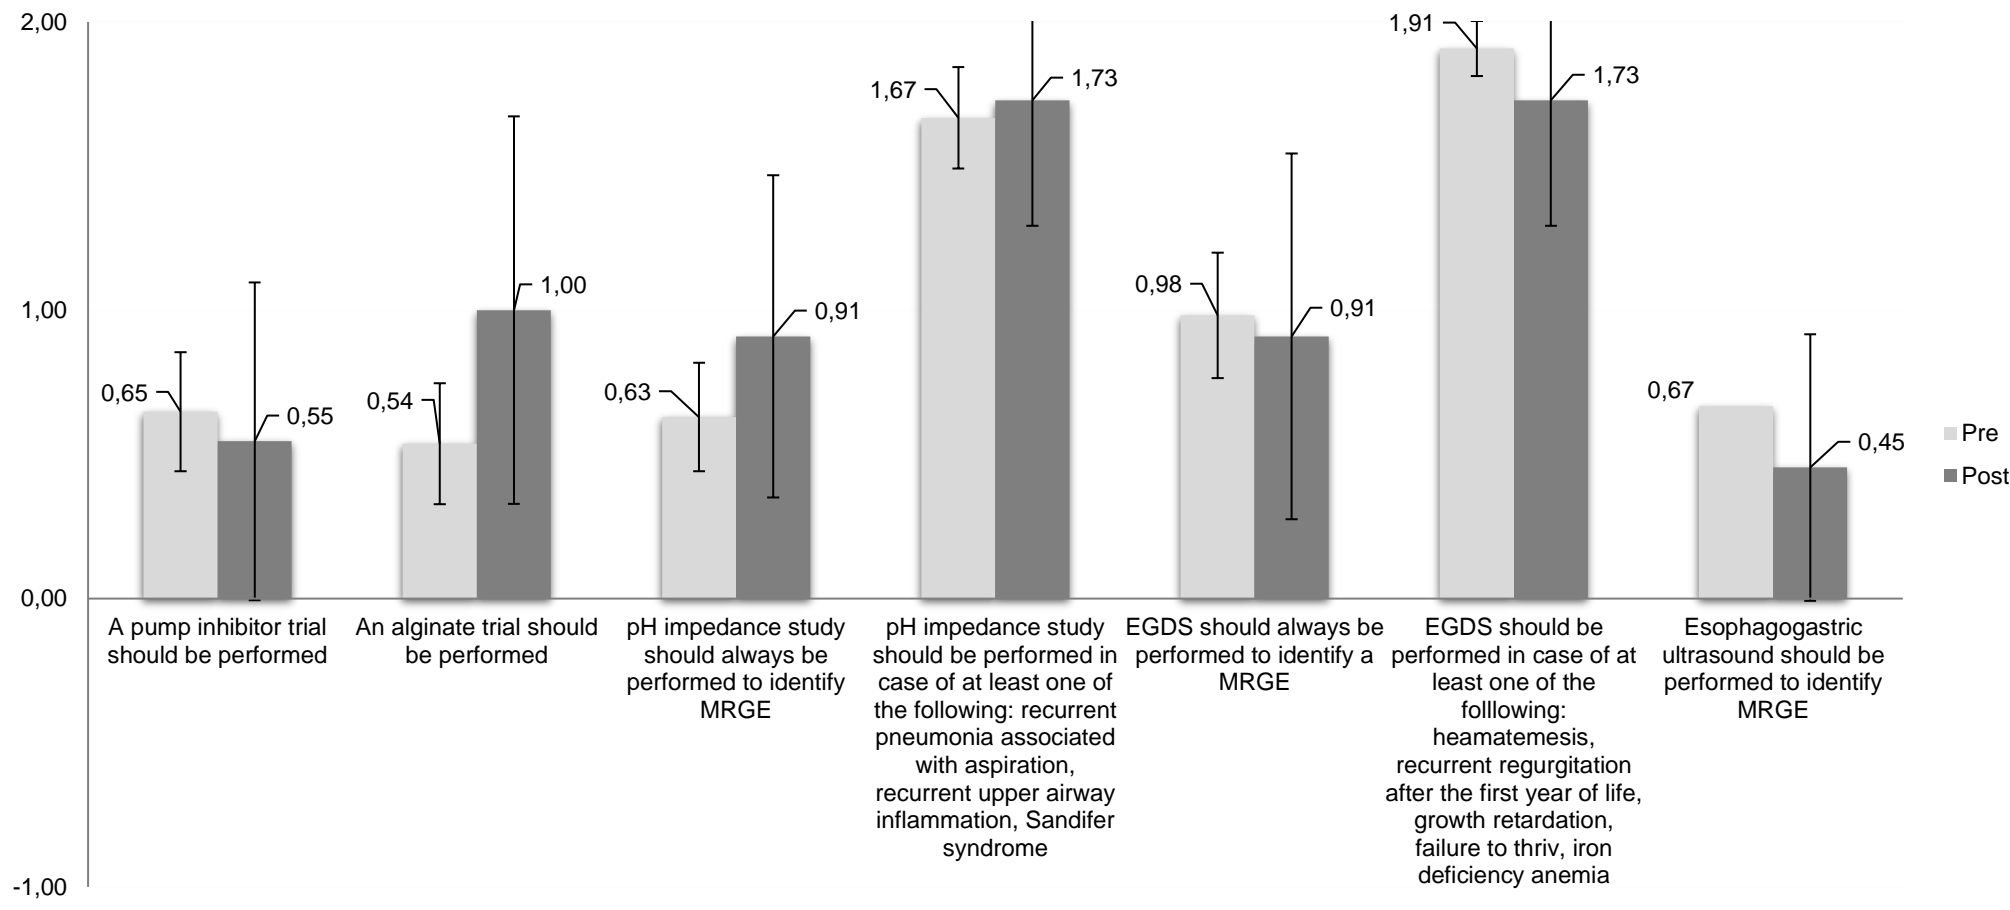

## 6. In case of hospitalization of a patient with an episode of ALTE. the following tests must be performed:

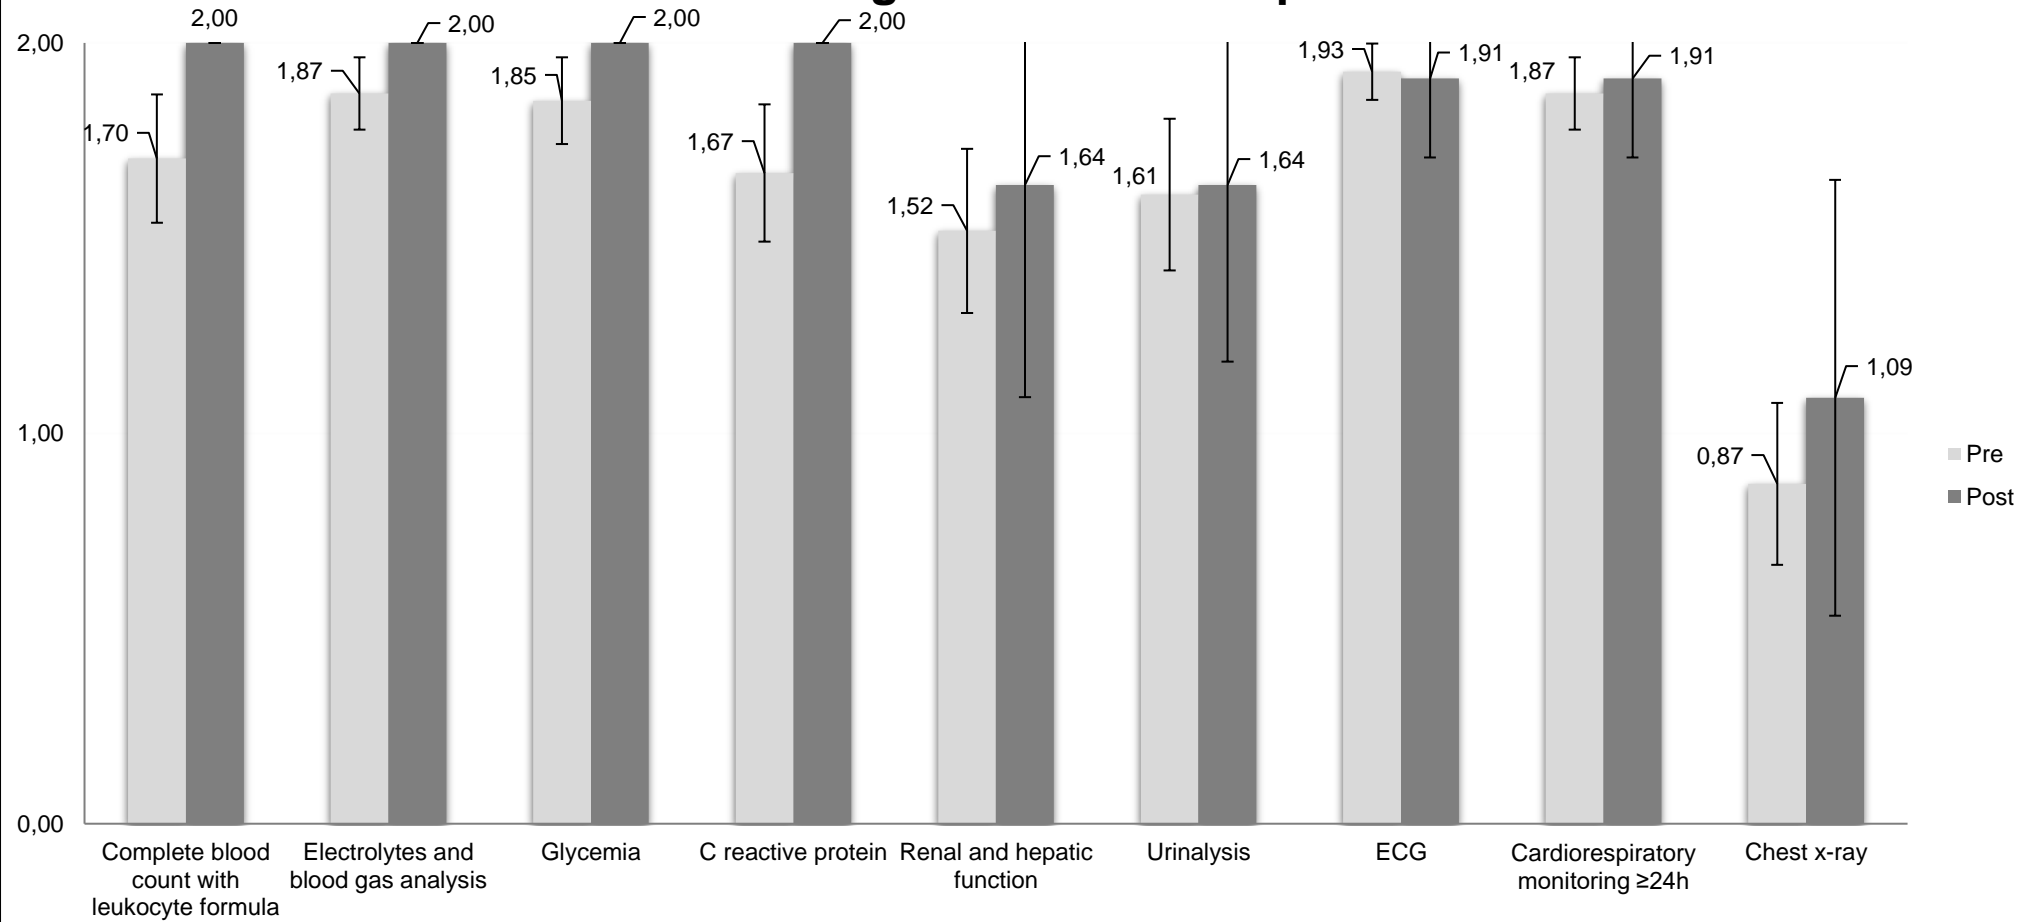

## 7. In the event of a BRUE / ALTE episode, tests for infectious disease should be performed:

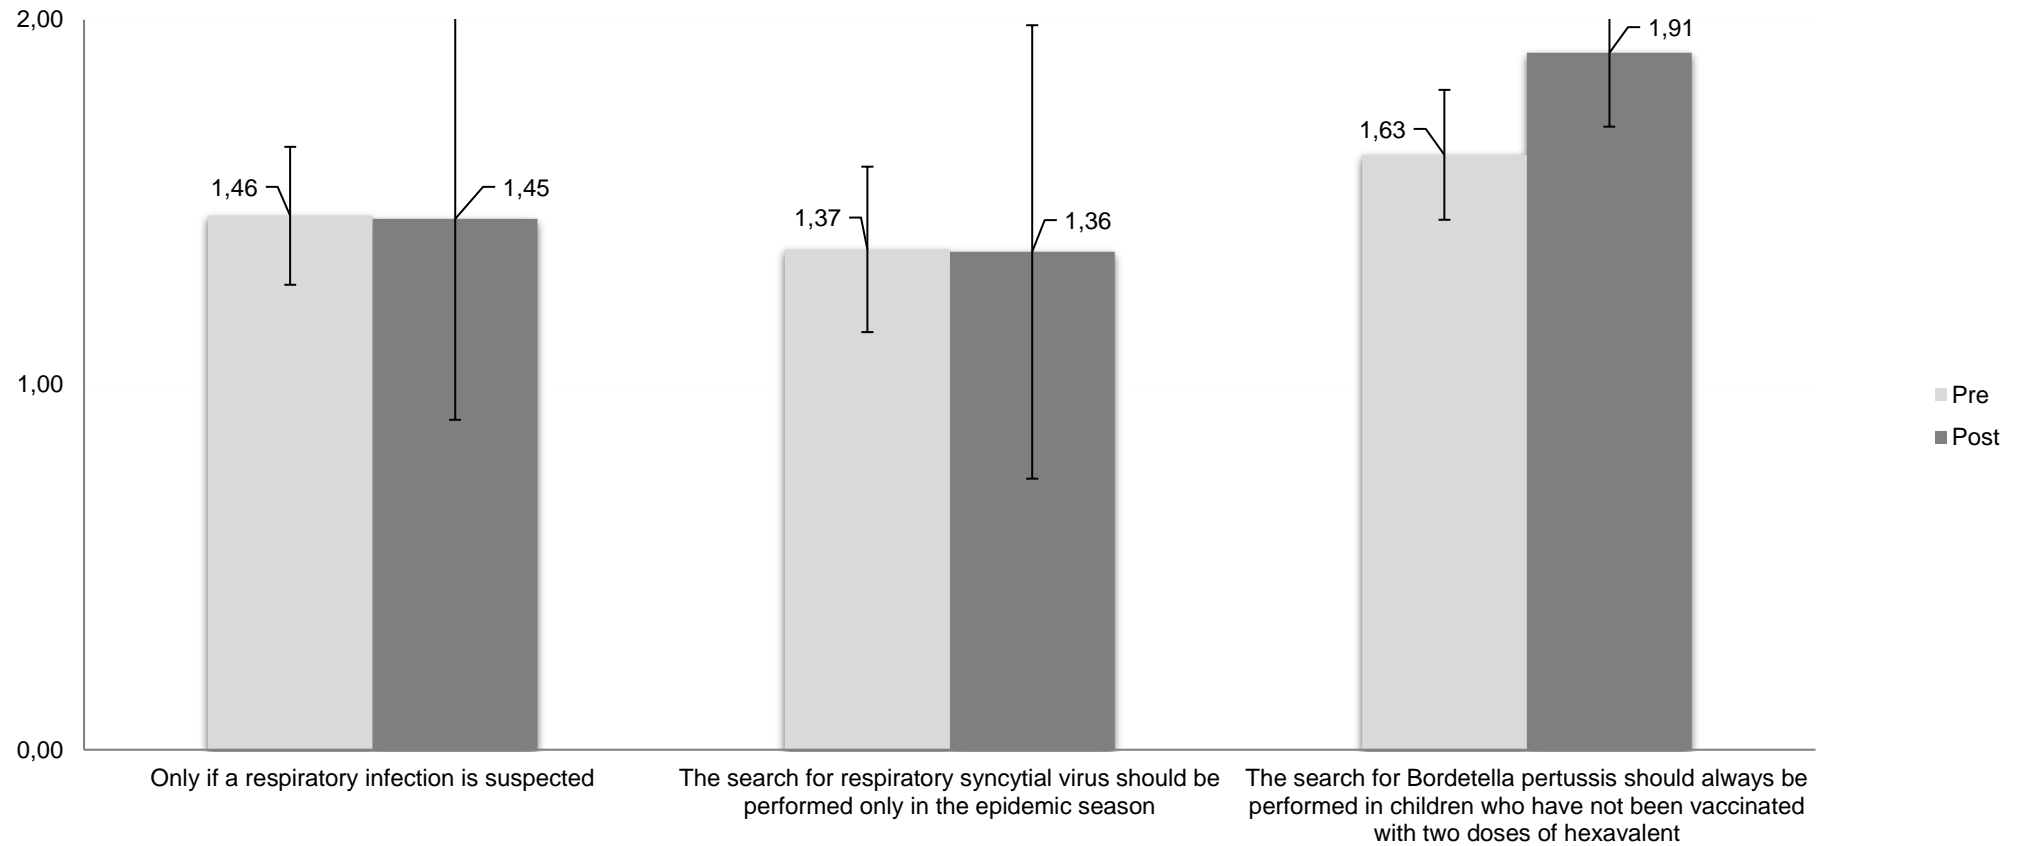

### 8. In case of episodes of BRUE / ALTE. polysomnography must be performed:

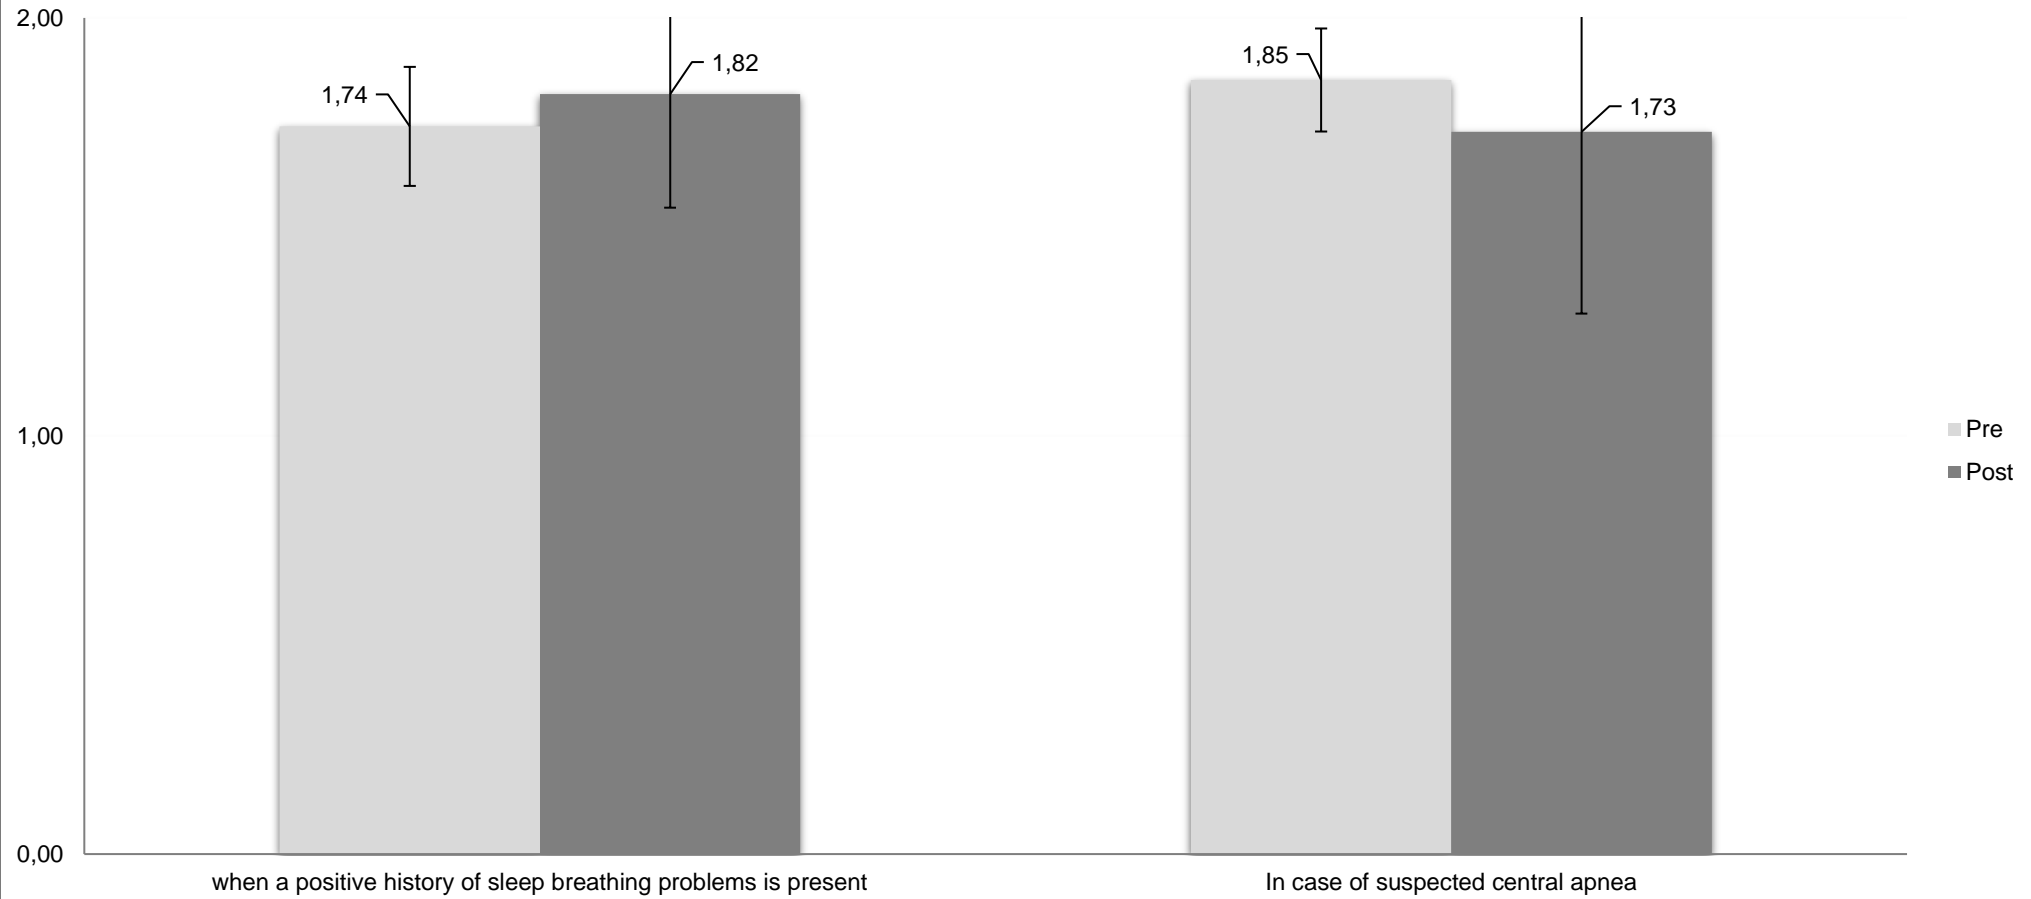



## 9. A metabolic disease should be suspected when BRUE / ALTE episodes are associated with:

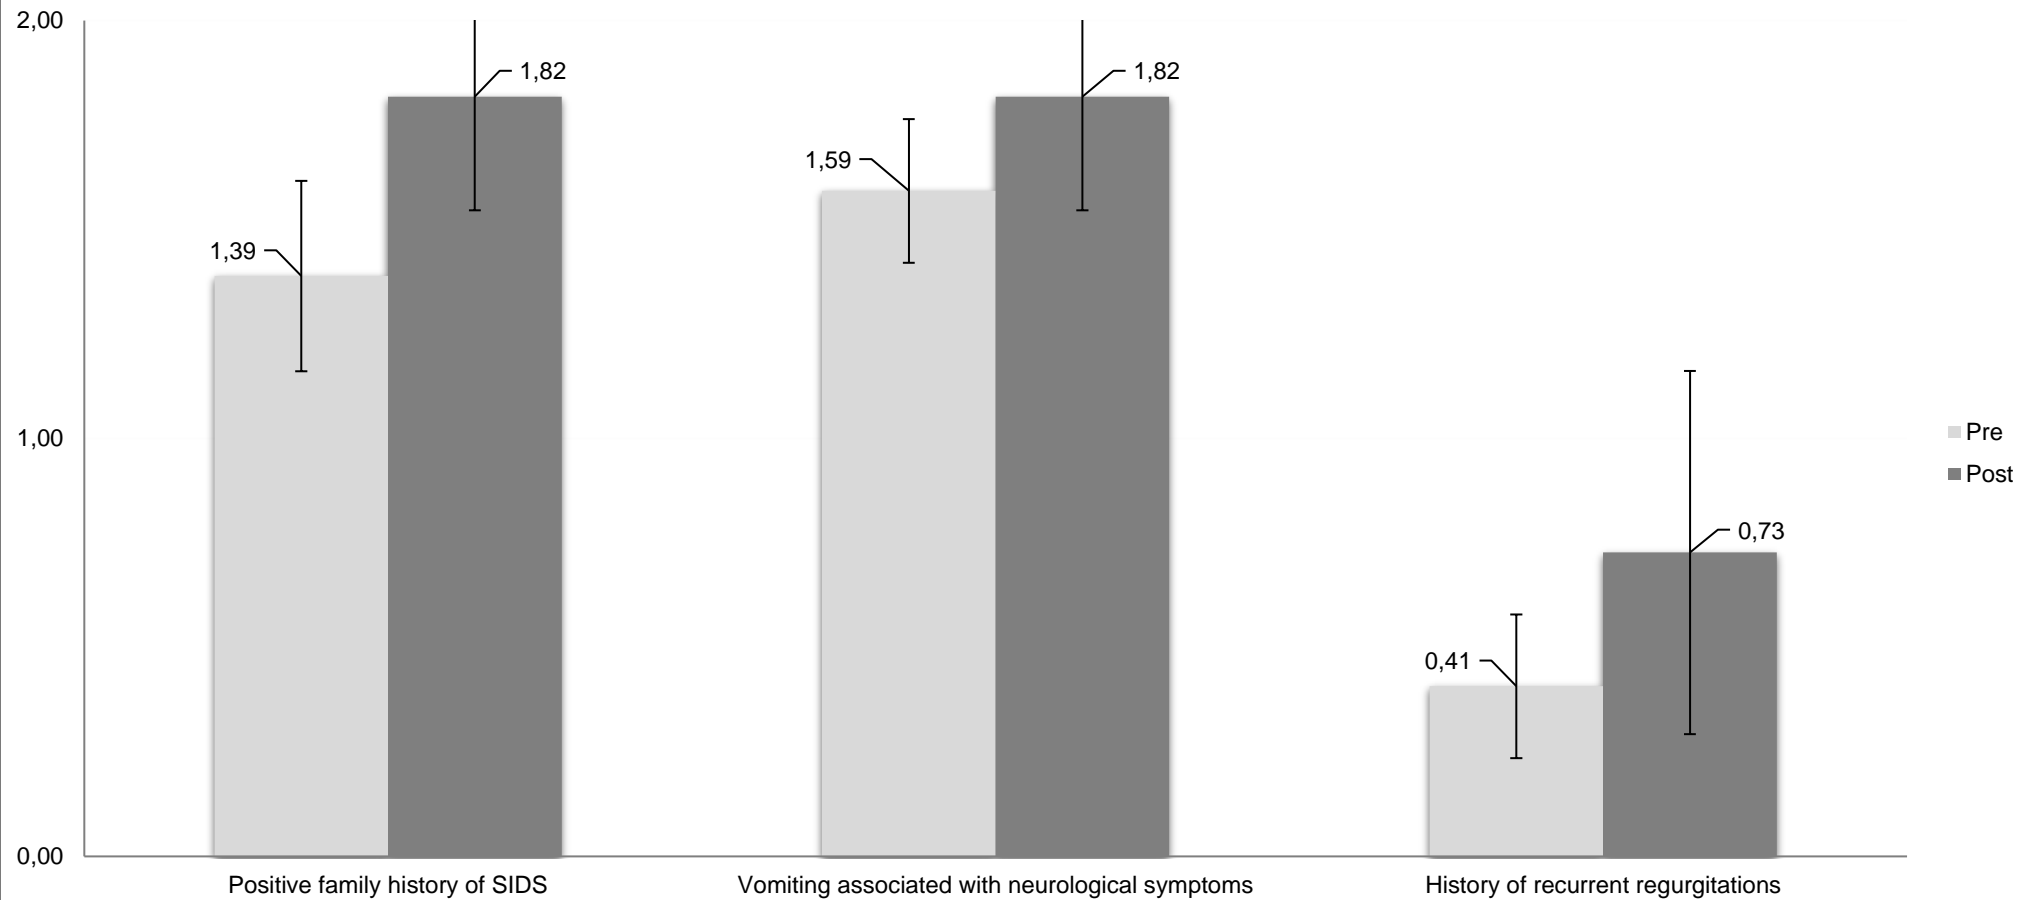

## 10. In case of ALTE with suspected metabolic disease it is recommended to perform:

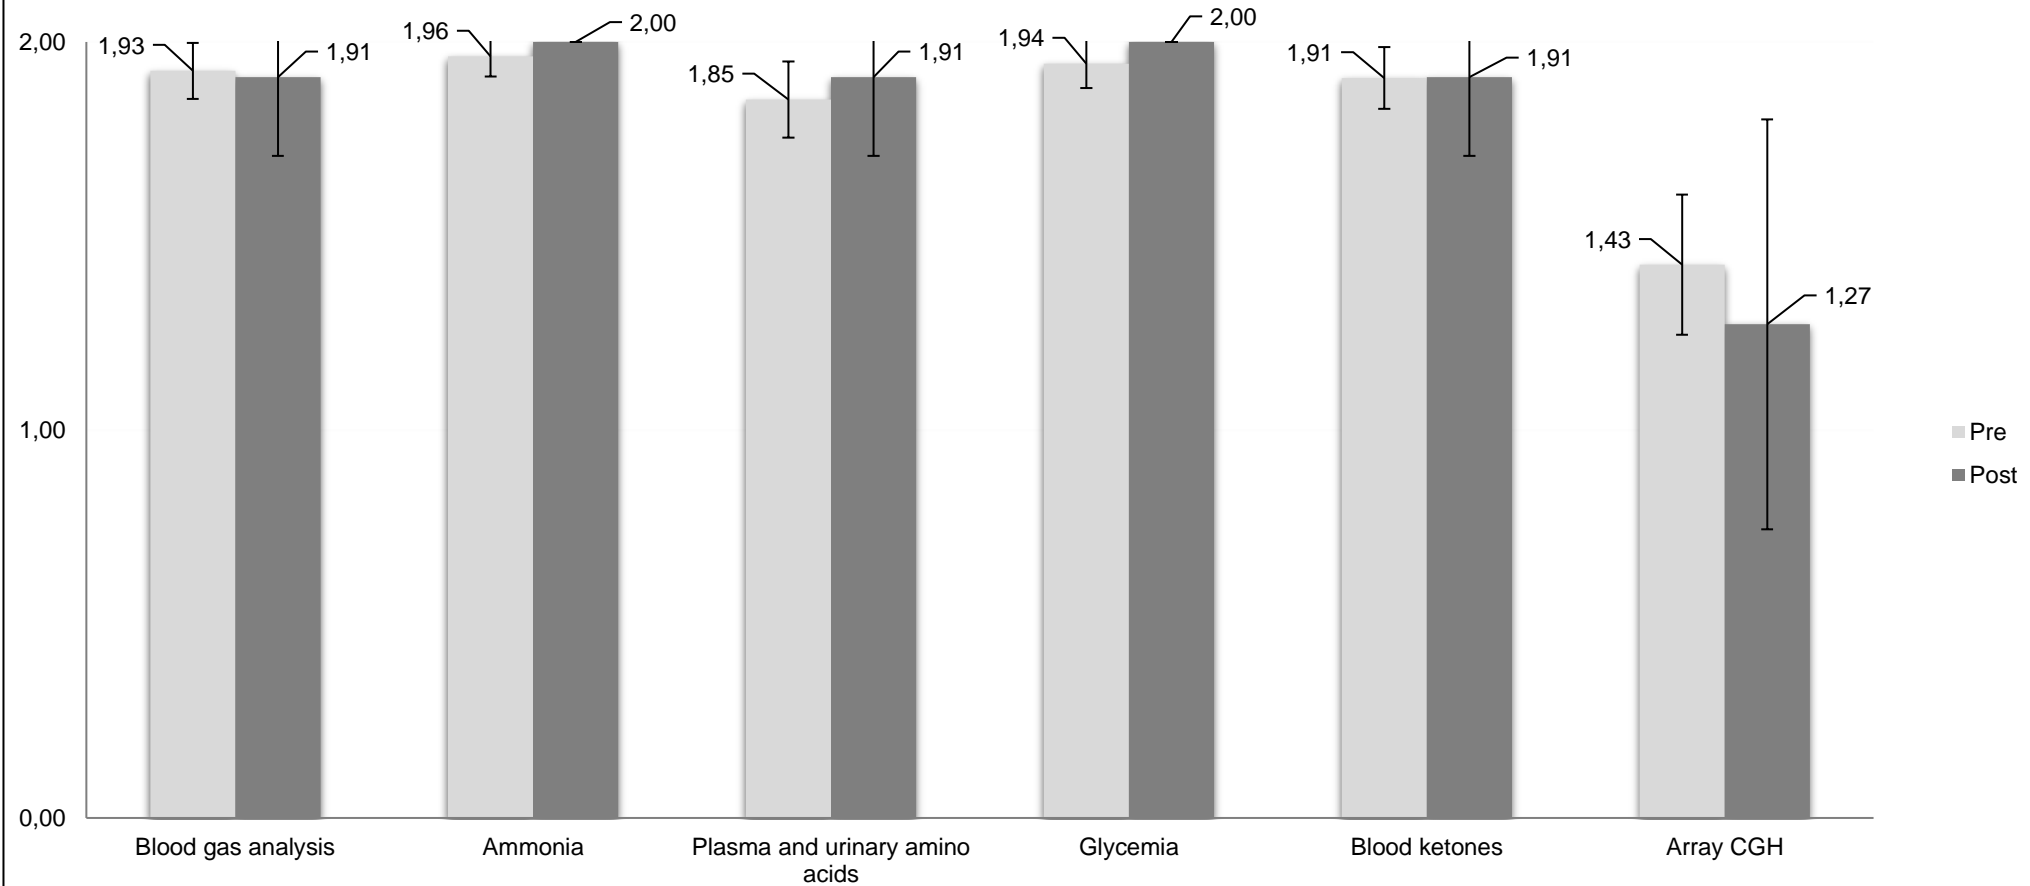

## 11. Pulse oximetry monitoring:

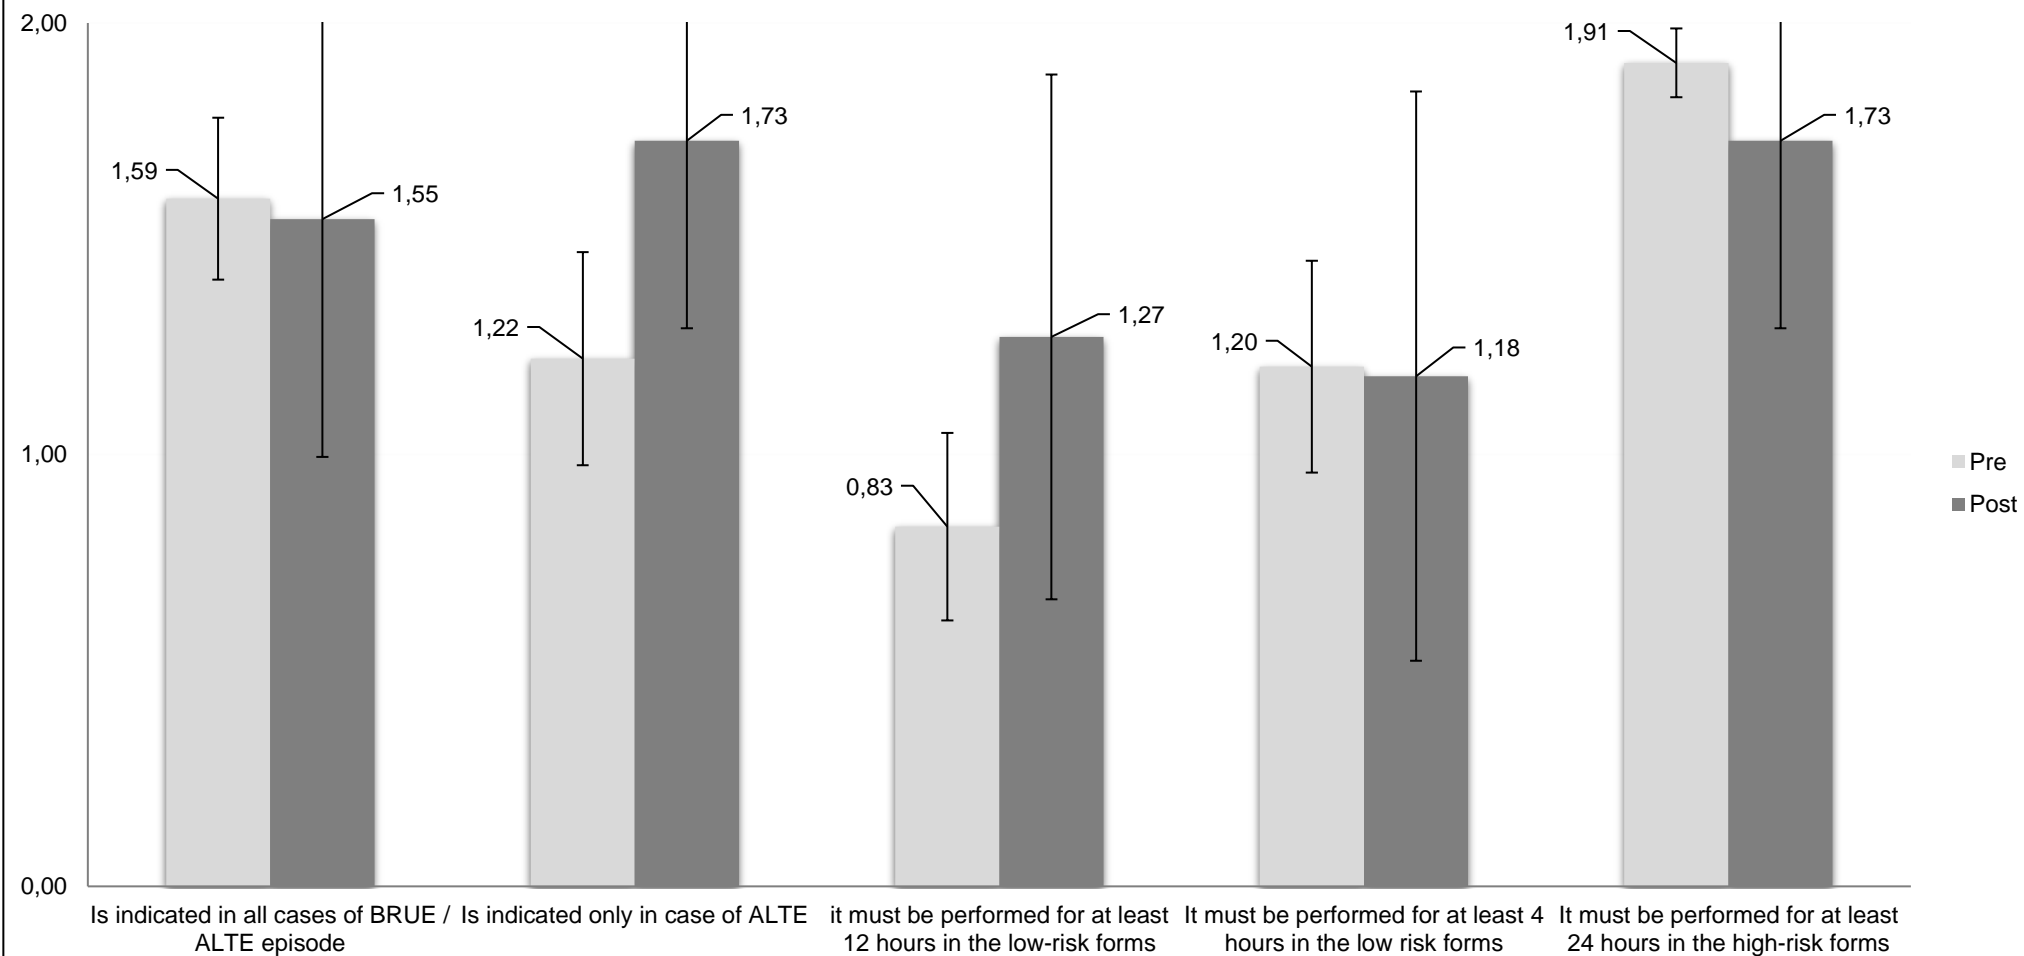

## 12. Home cardiorespiratory monitoring:

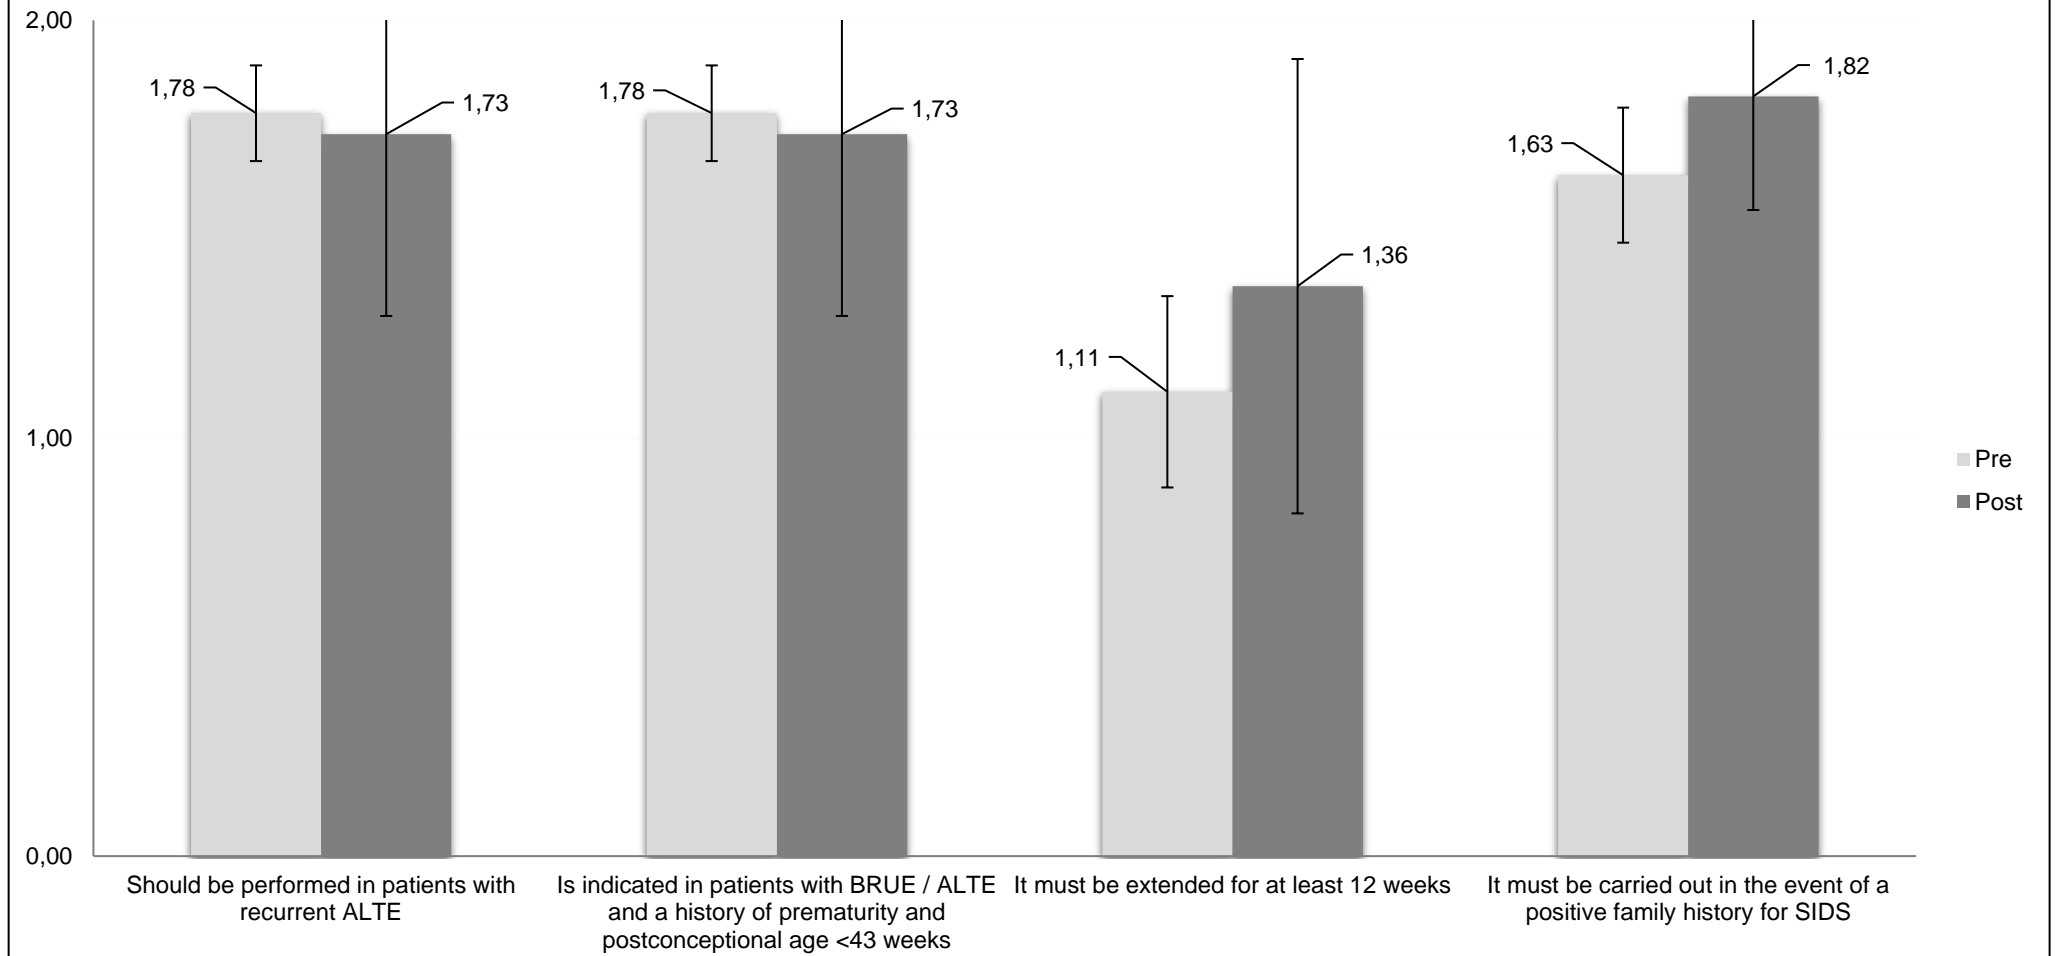

Supplement: life-11-00171-s001.pdf [file life-11-00171-s001.pdf]
